# Supplementary material for: Migrating cells mediate long-range WNT signaling
Source: Oxford University Press journal article supplement (doi:10.1242/dev.107656), 2014-05-06
Supplement: dev107656_supp.pdf [file dev107656_supp.pdf]

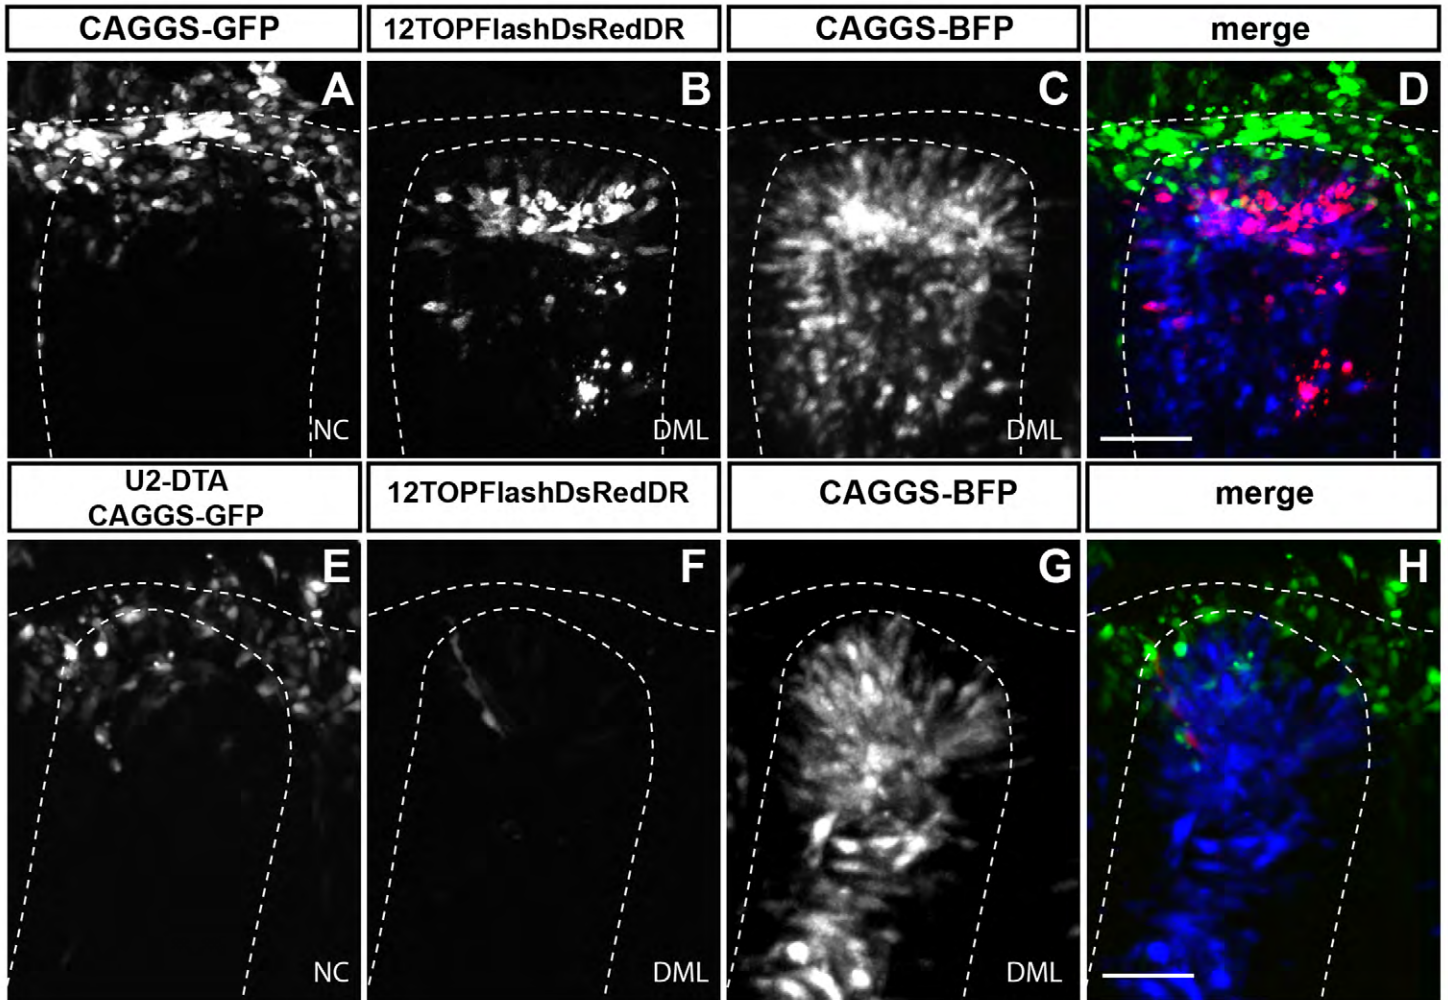

**Supplementary Figure 1. The neural crest is required for  $\beta$ -catenin dependent WNT signaling in somites.** A vector coding for U2 DTA was co-electroporated with CAGGS-GFP in the dorsal neural tube of E2 chick embryos (E-H). A few hours later, the neighbouring somites were co-electroporated with a combination of a TOPFLASH reporter (12TOPFLASH-DsRed-DR) and a CAGGS-BFP. As control, embryos were electroporated in the neural tube only with CAGGS-GFP (A-D). A-H are dorsal views of somites processed one day later for expression of GFP (A,E and green in D,H), RFP (B,F and red in D,H) and BFP (C,G and blue in D,H). A strong reduction of TOPFLASH activity is observed when neural crest cells are absent (F,H), compared to controls (B,D).

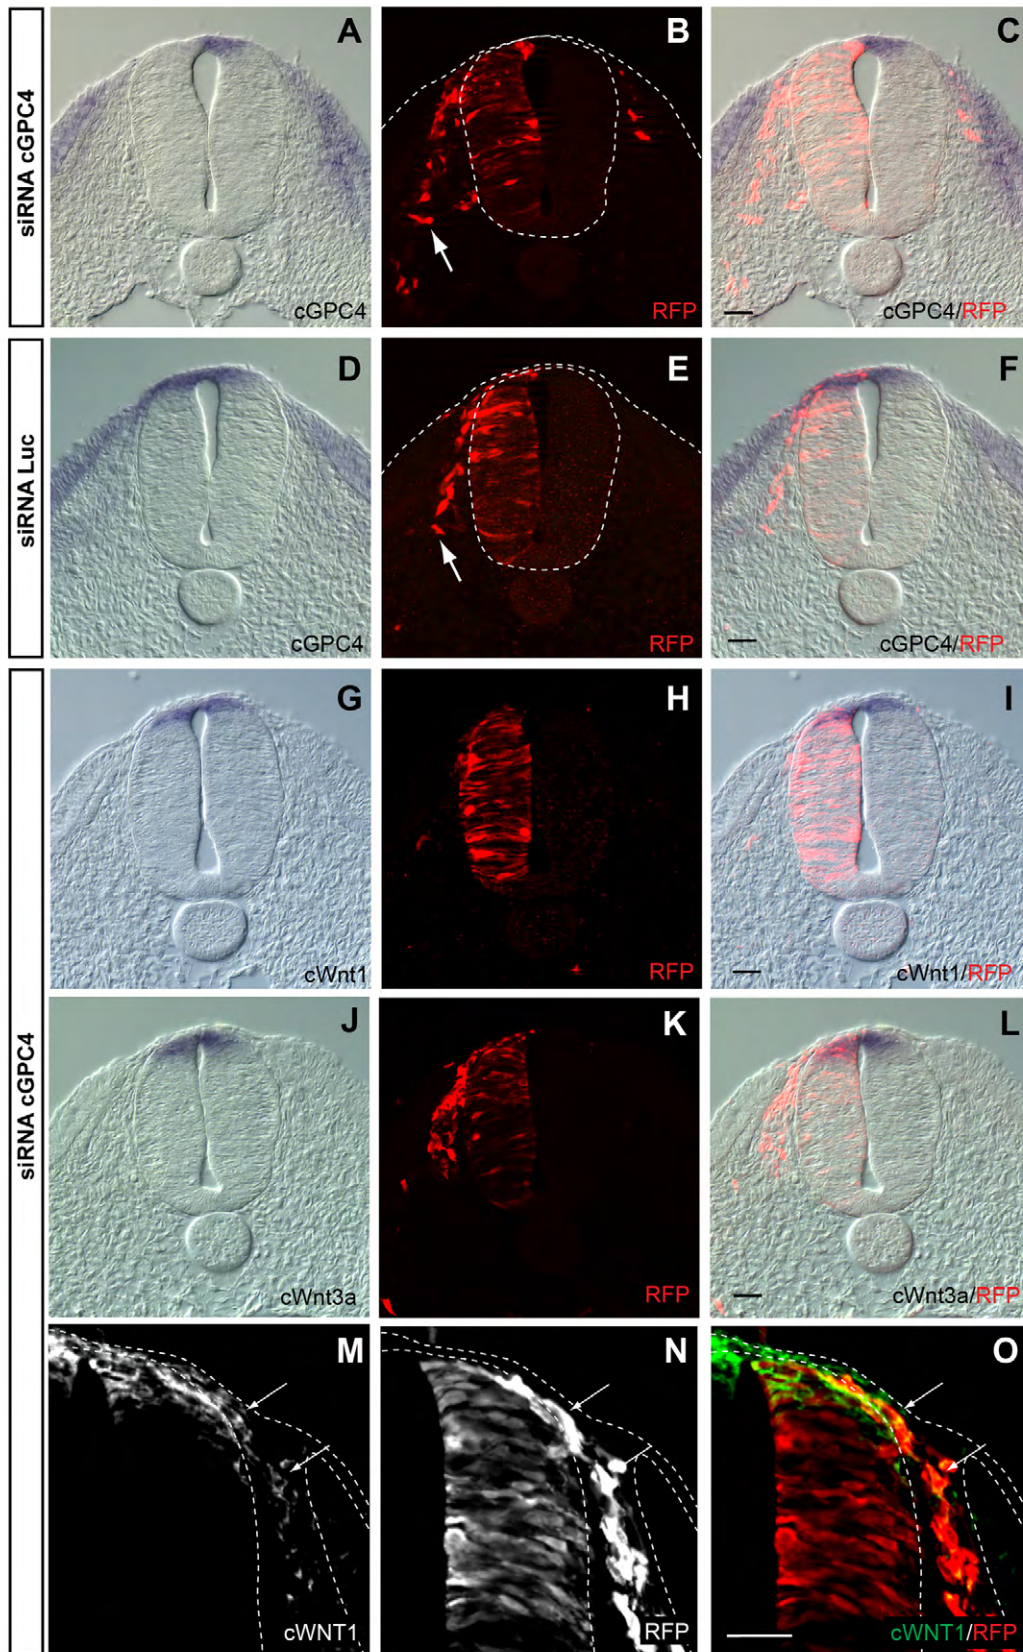

**Supplementary Figure 2. *GPC4* siRNA down-regulates the endogenous *cGPC4* transcript in the dorsal neural tube and migrating neural crest cells, but not *WNT1* or *WNT3a*.** siRNAs against the chick *GPC4* (A-C, G-L) or Luciferase (D-F) were electroporated in one half of the neural tube of E2.5 chick embryos. One day later, embryos were processed for *in situ* hybridization for *cGPC4* (A,F), *cWNT1* (G-I) or *cWNT3a* (J-L), sectioned, and immunostained for RFP to detect the electroporated cells. Arrows in (B,E) show electroporated migrating neural crest cells. (M-O) immunostaining for cWNT1 and RFP after neural tube electroporation of *GPC4* siRNA showing a persistence of the binding of cWNT1 at the surface of the neural crest cells (Arrows). Bars (C,F,I,L,O): 25 $\mu$ m.
